# Supplementary material for: A general and controllable synthesis of ComSn (Co9S8, Co3S4, and Co1−xS) hierarchical microspheres with homogeneous phases
Source: Royal Society of Chemistry journal article supplement (doi:10.1039/c3ce40251g), 2013-01-01
Supplement: c3ce40251g.pdf [file c3ce40251g.pdf]

## Electronic Supporting Information

### **A general synthesis of $\text{Co}_m\text{S}_n$ ( $\text{Co}_9\text{S}_8$ , $\text{Co}_3\text{S}_4$ , and $\text{Co}_{1-x}\text{S}$ ) hierarchical microspheres with controllable homogeneous phases**

**Qiao Liu, Junyan Zhang\***

State Key Laboratory of Solid Lubrication, Lanzhou Institute of Chemical Physics, Chinese Academy of Sciences, Lanzhou 730000, PR China. Fax: (+86) 9314968295; E-mail: zhangjunyan@licp.cas.cn

#### **Preparation of $\text{NiS}$ , $\text{Ni}_3\text{S}_4$ , $\text{NiCo}_2\text{S}_4$ , and $\text{FeS}_2$**

This facile and general approach was extended by the attempt to prepare other transition metal sulfides with controlled chemical compositions, such as  $\text{NiS}$ ,  $\text{Ni}_3\text{S}_4$ ,  $\text{NiCo}_2\text{S}_4$ , and  $\text{FeS}_2$ , etc. The detail was identical to the preparation of cobalt sulfides, and  $\text{Ni}(\text{OAc})_2 \cdot 4\text{H}_2\text{O}$  and  $\text{FeCl}_3$  were taken as metal precursors. Nickel sulfides were prepared under certain molar ratios of Ni/S as 1:1, 1:2 and 1:3, respectively; the synthesis of  $\text{FeS}_2$  and  $\text{NiCo}_2\text{S}_4$  respectively corresponded to the molar ratios of Fe/S=1:2.5 and Co/Ni/S=2:1:6. Without specification, all samples were prepared in EG medium at 200 °C for 8 h.

#### **Electrocatalytic experiments**

The electrochemical tests were carried out on an AutoLab workstation ( $\mu$  Autolab III) assembled with a model of ATA-1B rotational system, using a Pt pole as the counter electrode, Ag/AgCl electrode as the reference, the sample-coated glass carbon electrode as working electrode (WE). The WE was prepared by loading 4  $\mu\text{L}$  catalyst's nafion ink (the preparation as follows: 100  $\mu\text{L}$  of 5 wt% Nafion solution was added in 1mL of 4:1 v/v water/ethanol, and then 4 mg of catalyst was dispersed in it and sonicated to form a homogeneous ink). Then the electrode was dried under infrared lamp for 2 minutes. Cyclic voltammetry (CV) was measured in Ar- and  $\text{O}_2$ -saturated 0.1M KOH measurements electrolyte at room temperature ( $\sim 20$  °C) with a sweep rate of 20  $\text{mV s}^{-1}$ . Linear sweep voltammetries were obtained in  $\text{O}_2$ -saturated 0.1M KOH with a sweep rate of 20  $\text{mV s}^{-1}$ . Catalyst loading was  $\sim 0.283 \text{ mg cm}^{-2}$  for all samples.

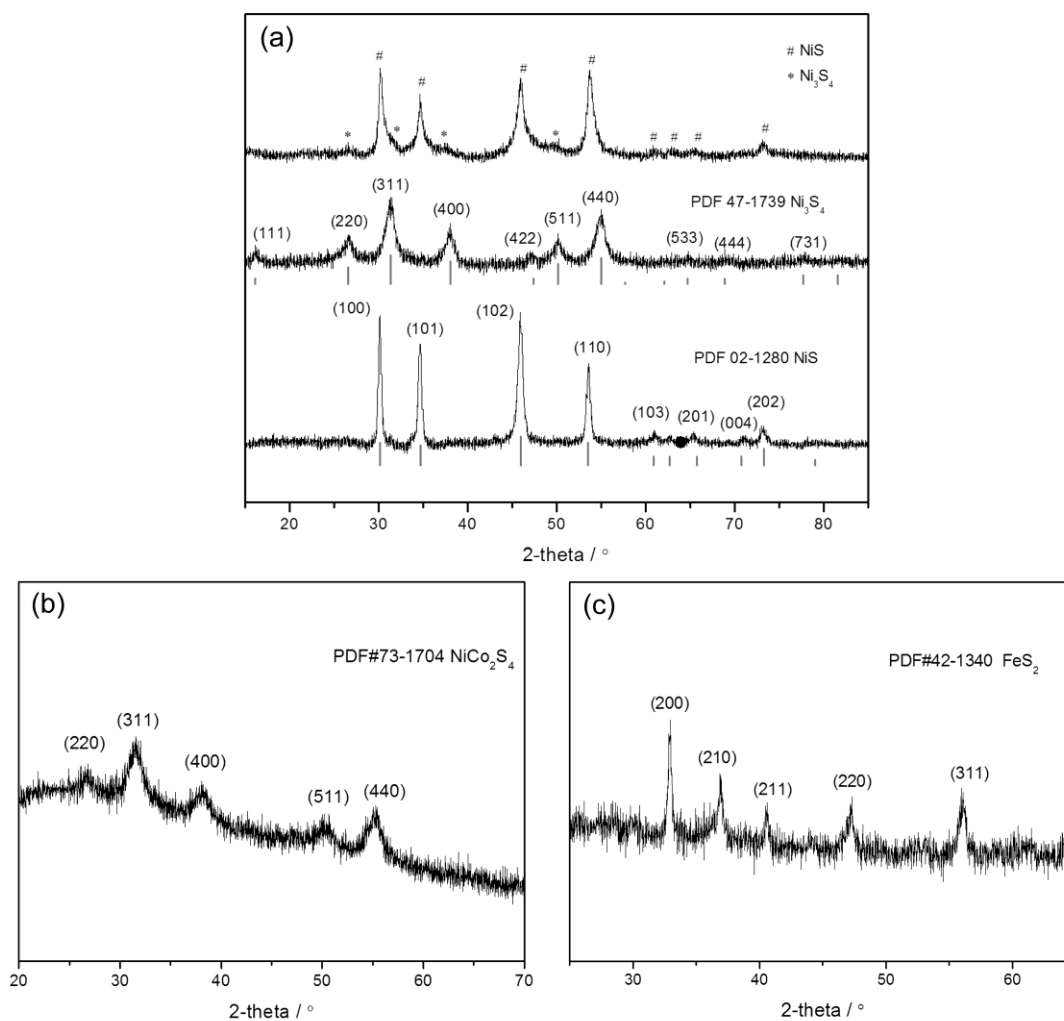

Fig. S1 XRD patterns of (a) nickel sulfides obtained at Ni/S molar ratios being 1:1, 1:2 and 1:3 (down to up), respectively corresponding to NiS, Ni<sub>3</sub>S<sub>4</sub>, and the mixture of NiS and Ni<sub>3</sub>S<sub>4</sub>; (b) NiCo<sub>2</sub>S<sub>4</sub> at Ni/Co/S molar ratio being 1:2:6 and (c) iron sulfide at Fe/S molar ratio being 1:2.5.

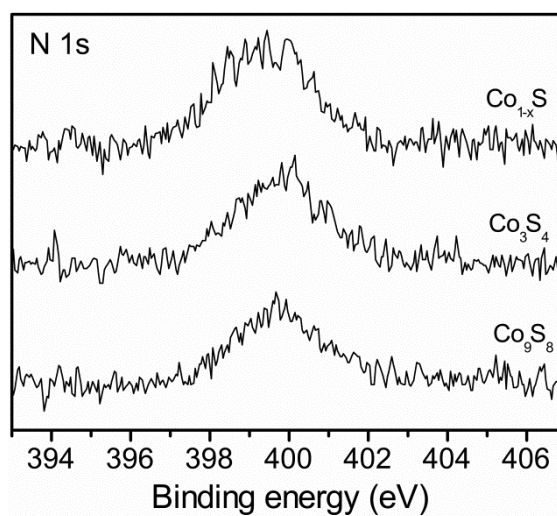

Fig. S2 XPS N 1s spectra of as-prepared Co<sub>9</sub>S<sub>8</sub>, Co<sub>3</sub>S<sub>4</sub>, and Co<sub>1-x</sub>S.

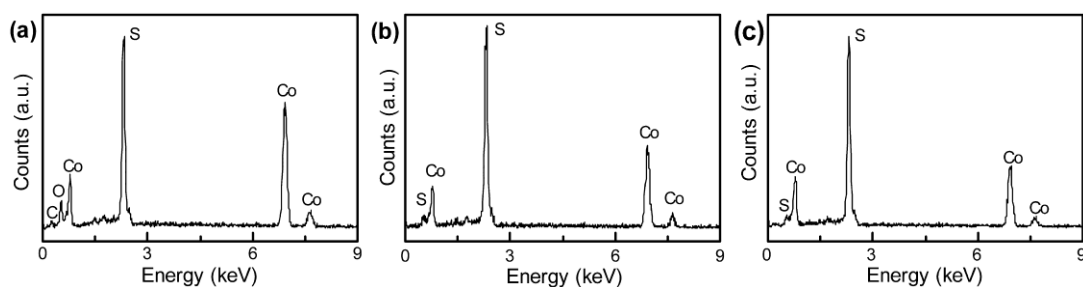

Fig. S3 EDS spectra of  $\text{Co}_9\text{S}_8$  (a),  $\text{Co}_3\text{S}_4$  (b), and  $\text{Co}_{1-x}\text{S}$  (c), confirming Co/S ratio in all samples close to their respective stoichiometric values. In the spectrum of  $\text{Co}_9\text{S}_8$ , oxygen element was observed, consistent with XPS result.

Table S1 Atomic concentration of Co and S obtained by XPS and EDS for three cobalt sulfides.

| samples | atomic Co/S from XPS | atomic Co/S from EDS | theoretical value                 |
|---------|----------------------|----------------------|-----------------------------------|
| CS-I    | 1.10                 | 1.134                | 1.125 ( $\text{Co}_9\text{S}_8$ ) |
| CS-II   | 0.740                | 0.734                | 0.75 ( $\text{Co}_3\text{S}_4$ )  |
| CS-III  | 0.569                | 0.564                | < 1 ( $\text{Co}_{1-x}\text{S}$ ) |

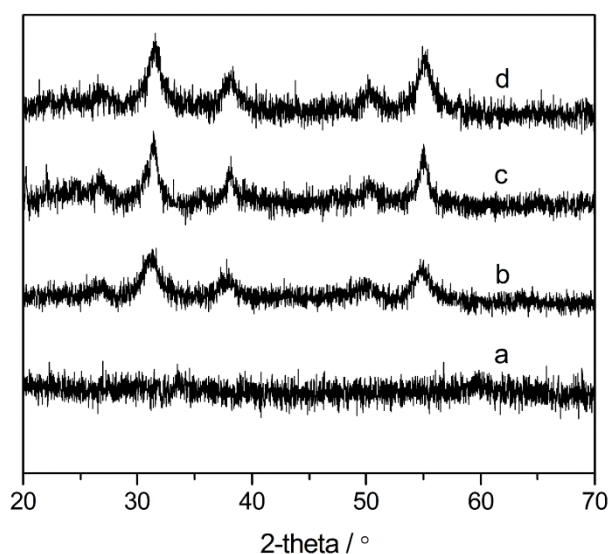

Fig. S4 XRD patterns of  $\text{Co}_3\text{S}_4$  samples synthesized from different reaction intervals: (a) 1 h, (b) 8 h, (c) 16 h, and (d) 48 h.

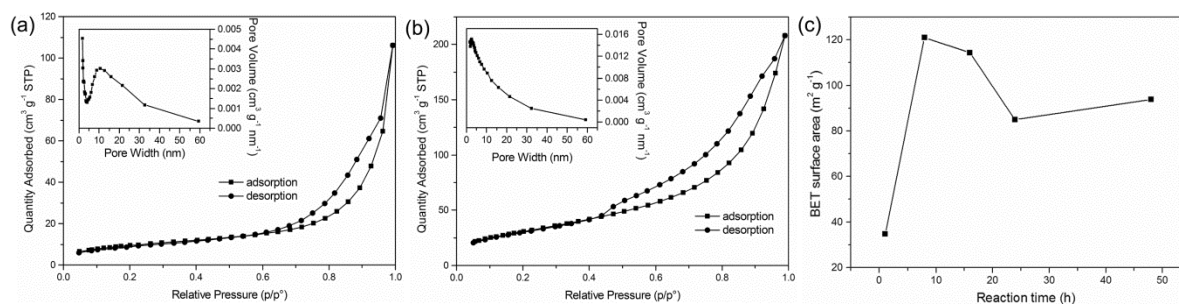

Fig. S5  $\text{N}_2$ -sorption isotherms of samples synthesized from Co/S=1:2 at different reaction intervals of 1 h (a) and 16 h (b). (c) The curve of reaction intervals vs. BET values of these samples prepared at different reaction intervals. From CS-1 to CS-48, their surface areas are respectively at 120.94, 34.89, 119.40, 85.15 and 93.89  $\text{m}^2 \text{g}^{-1}$ .
